# Supplementary material
Source: publisher site journal article supplement (https://www.dovepress.com/get_supplementary_file.php?f=481087.docx)
Supplement: Supplementary file 1 [file get_supplementary_file.php]

Supplementary material 1: Questionnaire.

1. How many years of service do you have in this field?

□＜4 years □4-10 years □11-15 years □＞15 years

1. What is your professional title?

□Nurse □Nursing specialist □Head nurse □Deputy chief nurse □Chief nurse

1. What is your educational background?

□College diploma □Bachelor’s degree □Master’s degree □Doctoral degree

1. Are you a orthopedic specialist nurse?

□Yes □No

1. Have you worked in the ICU?

□Yes □No

1. Is there training available for nurses in your hospital regarding the management of delirium in elderly patients with fractures?

□Yes □No

1. What are the training contents for elderly fracture patients with delirium at your hospital?

□Assessment of delirium risk factors □Screening for delirium □Preventive measures for delirium □Therapeutic interventions for delirium

1. Have you accepted delirium management training?

□Yes □No

1. Do you conduct delirium risk assessments for older patients following hip fracture surgery?

□Yes □No

1. Does your department have clear requirements for the qualifications of personnel conducting delirium risk assessments?

□Yes □No

1. Who in your department conducts delirium risk screening for elderly patients with fractures?

□Registered nurse □Registered nurse who has received training □orthopedic specialist nurse □Doctor

1. When does your department conduct delirium risk assessment for each elderly fracture patient?

□At the time of admission □Within 24 hours of admission □One day before surgery

□After the patient returns to the ward on the day of surgery □Postoperative day 1

□Postoperative day 2 □Postoperative day 3 □After the occurrence of delirium

1. Do you conduct delirium screening for older patients following hip fracture surgery?

□Yes □No

1. Does your department have clear requirements for the qualifications of personnel conducting delirium screening?

□Yes □No

1. Who in your department conducts delirium screening for elderly patients with fractures?

□Registered nurse □Registered nurse who has received training □orthopedic specialist nurse □Doctor

1. What delirium screening tools do you use?

□Confusion Assessment Method(CAM) □Nursing Delirium Screening Scale(Nu DESC) □Arousal, Attention, Abbreviated Mental Test-4, Acute Change(4AT)

1. When does your department conduct delirium screening for each elderly fracture patient?

□On the day of return to the ward after surgery □Postoperative day 1 □From after the surgery until postoperative day 5 □After the occurrence of delirium □Regular screening

1. Do you implement comprehensive delirium prevention measures?

□Yes □No

1. What general nursing measures does your department take to prevent postoperative delirium?

□Maintain limb warmth □Oxygen therapy □Correct volume deficit □Enhance nutrition□Monitor physiological parameters □Adequate pain management □Screen for underlying causes □Avoid polypharmacy

1. Do you implement prevention measures for dehydration, constipation, and electrolyte abnormalities?

□Yes □No

1. Do you implement prevention measures for malnutrition?

□Yes □No

1. Do you implement prevention measures for infection and fever?

□Yes □No

1. Do you implement prevention measures for immobilization or restricted mobility?

□Yes □No

1. Do you implement prevention measures for pain?

□Yes □No

1. What is the incidence rate of postoperative delirium among elderly fracture patients in your department from January to March 2023?
